# Supplementary material for: Associations between Multiple Health Indicators and Carotid Artery Intima-Media Thickness in A Healthy and Active Elderly Population
Source: MDPI journal article supplement (doi:10.3390/jcdd11040101), 2024-03-28
Supplement: s1 [file s1]

## Supplementary material

**Supplementary Table S1. MULTIPLE COMPARISON BONFERRONI**

| Dependent Variable  | CIMT categories | CIMT categories | Mean Difference | Std. Error | Sig.  | 95% Confidence Interval |             |
|---------------------|-----------------|-----------------|-----------------|------------|-------|-------------------------|-------------|
|                     |                 |                 |                 |            |       | Lower Bound             | Upper Bound |
| Age                 | Low             | Middle          | -2.91           | 0.49       | <.001 | -4.07                   | -1.75       |
|                     |                 | High            | -6.70           | 0.61       | <.001 | -8.16                   | -5.23       |
|                     | Middle          | Low             | 2.91            | 0.49       | <.001 | 1.75                    | 4.07        |
|                     |                 | High            | -3.79           | 0.52       | <.001 | -5.03                   | -2.55       |
|                     | High            | Low             | 6.70            | 0.61       | <.001 | 5.23                    | 8.16        |
|                     |                 | Middle          | 3.79            | 0.52       | <.001 | 2.55                    | 5.03        |
| Systolic            | Low             | Middle          | -5.62           | 1.27       | <.001 | -8.67                   | -2.56       |
|                     |                 | High            | -11.47          | 1.62       | <.001 | -15.35                  | -7.60       |
|                     | Middle          | Low             | 5.62            | 1.27       | <.001 | 2.56                    | 8.67        |
|                     |                 | High            | -5.86           | 1.36       | <.001 | -9.13                   | -2.59       |
|                     | High            | Low             | 11.47           | 1.62       | <.001 | 7.60                    | 15.35       |
|                     |                 | Middle          | 5.86            | 1.36       | <.001 | 2.59                    | 9.13        |
| Diastolic           | Low             | Middle          | -0.97           | 0.75       | 0.59  | -2.77                   | 0.83        |
|                     |                 | High            | -2.65           | 0.95       | 0.02  | -4.94                   | -0.37       |
|                     | Middle          | Low             | 0.97            | 0.75       | 0.59  | -0.83                   | 2.77        |
|                     |                 | High            | -1.69           | 0.80       | 0.11  | -3.61                   | 0.24        |
|                     | High            | Low             | 2.65            | 0.95       | 0.02  | 0.37                    | 4.94        |
|                     |                 | Middle          | 1.69            | 0.80       | 0.11  | -0.24                   | 3.61        |
| Weight (pounds)     | Low             | Middle          | -3.08           | 2.63       | 0.73  | -9.40                   | 3.23        |
|                     |                 | High            | -16.67          | 3.52       | <.001 | -25.10                  | -8.23       |
|                     | Middle          | Low             | 3.08            | 2.63       | 0.73  | -3.23                   | 9.40        |
|                     |                 | High            | -13.58          | 3.04       | <.001 | -20.87                  | -6.30       |
|                     | High            | Low             | 16.67           | 3.52       | <.001 | 8.23                    | 25.10       |
|                     |                 | Middle          | 13.58           | 3.04       | <.001 | 6.30                    | 20.87       |
| Height (inches)     | Low             | Middle          | -0.62           | 0.31       | 0.14  | -1.36                   | 0.12        |
|                     |                 | High            | -1.98           | 0.41       | <.001 | -2.97                   | -1.00       |
|                     | Middle          | Low             | 0.62            | 0.31       | 0.14  | -0.12                   | 1.36        |
|                     |                 | High            | -1.37           | 0.35       | <.001 | -2.22                   | -0.52       |
|                     | High            | Low             | 1.98            | 0.41       | <.001 | 1.00                    | 2.97        |
|                     |                 | Middle          | 1.37            | 0.35       | <.001 | 0.52                    | 2.22        |
| BMI                 | Low             | Middle          | -0.01           | 0.32       | 1.00  | -0.78                   | 0.77        |
|                     |                 | High            | -1.03           | 0.43       | 0.05  | -2.06                   | 0.01        |
|                     | Middle          | Low             | 0.01            | 0.32       | 1.00  | -0.77                   | 0.78        |
|                     |                 | High            | -1.02           | 0.37       | 0.02  | -1.91                   | -0.12       |
|                     | High            | Low             | 1.03            | 0.43       | 0.05  | -0.01                   | 2.06        |
|                     |                 | Middle          | 1.02            | 0.37       | 0.02  | 0.12                    | 1.91        |
| Functional strength | Low             | Middle          | -0.62           | 0.26       | 0.05  | -1.24                   | -0.01       |
|                     |                 | High            | 0.20            | 0.34       | 1.00  | -0.62                   | 1.01        |
|                     | Middle          | Low             | 0.62            | 0.26       | 0.05  | 0.01                    | 1.24        |
|                     |                 | High            | 0.82            | 0.29       | 0.02  | 0.12                    | 1.52        |
|                     | High            | Low             | -0.20           | 0.34       | 1.00  | -1.01                   | 0.62        |
|                     |                 | Middle          | -0.82           | 0.29       | 0.02  | -1.52                   | -0.12       |
|                     | Low             | Middle          | -3.34           | 0.94       | 0.00  | -5.60                   | -1.08       |

|                               |        |        |       |      |      |       |       |
|-------------------------------|--------|--------|-------|------|------|-------|-------|
| Handgrip Left (kg)            |        | High   | -3.71 | 1.18 | 0.01 | -6.55 | -0.87 |
|                               | Middle | Low    | 3.34  | 0.94 | 0.00 | 1.08  | 5.60  |
|                               |        | High   | -0.37 | 1.00 | 1.00 | -2.75 | 2.02  |
|                               | High   | Low    | 3.71  | 1.18 | 0.01 | 0.87  | 6.55  |
|                               |        | Middle | 0.37  | 1.00 | 1.00 | -2.02 | 2.75  |
| Handgrip Right (kg)           | Low    | Middle | -2.05 | 0.96 | 0.10 | -4.36 | 0.25  |
|                               |        | High   | -2.73 | 1.21 | 0.07 | -5.63 | 0.17  |
|                               | Middle | Low    | 2.05  | 0.96 | 0.10 | -0.25 | 4.36  |
|                               |        | High   | -0.68 | 1.02 | 1.00 | -3.11 | 1.76  |
|                               | High   | Low    | 2.73  | 1.21 | 0.07 | -0.17 | 5.63  |
|                               |        | Middle | 0.68  | 1.02 | 1.00 | -1.76 | 3.11  |
| Predicted VO <sub>2</sub> max | Low    | Middle | -0.26 | 0.84 | 1.00 | -2.27 | 1.76  |
|                               |        | High   | 0.78  | 1.11 | 1.00 | -1.88 | 3.44  |
|                               | Middle | Low    | 0.26  | 0.84 | 1.00 | -1.76 | 2.27  |
|                               |        | High   | 1.04  | 0.98 | 0.87 | -1.31 | 3.38  |
|                               | High   | Low    | -0.78 | 1.11 | 1.00 | -3.44 | 1.88  |
|                               |        | Middle | -1.04 | 0.98 | 0.87 | -3.38 | 1.31  |

**Supplementary Table S2. CORRELATIONS WITHOUT CONTROLS**

|   | Age<br>[n=1818] | Systolic BP<br>[n=1046] | Dias - BP<br>[n=1045] | Weight<br>[n=975] | Height<br>[n=978] | BMI<br>[n=974] | Functional<br>Strength<br>[n=467] | Handgrip<br>[n=871] | Handgrip<br>R [n=871] | Predicted VO <sub>2</sub><br>max<br>[n=611] |
|---|-----------------|-------------------------|-----------------------|-------------------|-------------------|----------------|-----------------------------------|---------------------|-----------------------|---------------------------------------------|
| R | 0.283           | 0.253                   | 0.074                 | 0.17              | 0.153             | 0.07           | -0.025                            | 0.132               | 0.074                 | -0.035                                      |
| P | <0.001          | <0.001                  | 0.016                 | <0.001            | <0.001            | 0.029          | 0.597                             | <0.001              | 0.029                 | 0.382                                       |
